1 **Highly Pathogenic Avian Influenza A (H5N1) clade 2.3.4.4b Virus detected in dairy cattle**

2

3 Xiao Hu, Anugrah Saxena, Drew R. Magstadt, Phillip C. Gauger, Eric Burrough, Jianqiang

4 Zhang, Chris Siepker, Marta Mainenti, Patrick J. Gorden, Paul Plummer, Ganwu Li\*

5

6 Department of Veterinary Diagnostic and Production Animal Medicine, College of Veterinary

7 Medicine, Iowa State University, 1800 Christensen Drive, Ames, IA 50011, USA

8

9 \*Address for corresponding: Ganwu Li

10 email: [liganwu@iastate.edu](mailto:liganwu@iastate.edu)

11 Tel: +86- 451-51997177

12 Fax: +86- 451-51997166

13

14

15 **Abstract**

16 The global emergence of highly pathogenic avian influenza (HPAI) A (H5N1) clade 2.3.4.4b  
17 viruses poses a significant global public health threat. Until March 2024, no outbreaks of this  
18 virus clade had occurred in domestic cattle. We genetically characterize HPAI viruses from dairy  
19 cattle showing an abrupt drop in milk production. They share nearly identical genome sequences,  
20 forming a new genotype B3.13 within the 2.3.4.4b clade. B3.13 viruses underwent two  
21 reassortment events since 2023 and exhibit critical mutations in HA, M1, and NS genes but lack  
22 critical mutations in PB2 and PB1 genes, which enhance virulence or adaptation to mammals.  
23 The PB2 E627K mutation in a human case underscores the potential for rapid evolution post-  
24 infection, highlighting the need for continued surveillance to monitor public health threats.

## 25 **Introduction**

26 Highly pathogenic avian influenza (HPAI) A (H5N1) virus belonging to clade 2.3.4.4b  
27 represents a significant global concern due to its severe impact on poultry populations, wildlife,  
28 and potential risks to human health. The origin of clade 2.3.4.4b can be traced back to 2020  
29 when the H5N1 virus first emerged in domestic poultry in countries in East and Southeast Asia  
30 (<https://wahis.woah.org#/home>). Initial outbreaks were primarily confined to avian species,  
31 causing significant mortality among infected birds and posing substantial economic losses to the  
32 poultry industry (1-3). However, clade 2.3.4.4b exhibited a remarkable capability for geographic  
33 spread and host adaptation, leading to its dissemination across multiple continents through  
34 migratory bird pathways and global trade networks since 2020 (3-8). In late 2021, clade 2.3.4.4b  
35 H5N1 virus was introduced to North America from Eurasia and disseminated throughout the  
36 continent via wild birds, subsequently infecting numerous wild terrestrial mammals, such as  
37 foxes, skunks, bears, bobcats, and raccoons, posing a significant concern to public health (5, 9,  
38 10).

39 Migratory birds play a significant role in transmitting HPAI viruses due to their ability to carry  
40 the virus over long distances (11-14). Texas lies within the Central Flyway, a major migratory  
41 flyway stretching from Canada to Mexico in North America  
42 (<https://tpwd.texas.gov/huntwild/wild/birding/migration/flyways/>). Additionally, Texas  
43 experiences some overlap in bird migration with neighboring states that belong to the Mississippi  
44 Flyway. This convergence of flyways heightens the risk of HPAI viral transmission, as migratory  
45 birds traverse diverse landscapes and habitats, including dairy cattle operations. In February and  
46 March 2024, a syndrome occurred in dairy cattle in the Texas panhandle region where affected  
47 animals developed a nonspecific illness and abrupt drop in milk production. Similar clinical

48 cases were subsequently reported in dairy cattle in southwestern Kansas and northeastern New  
49 Mexico and mortalities in wild birds and domestic cats were observed within and around the  
50 affected sites in the Texas Panhandle. Here we present our findings on the detection, genomic  
51 characterization, phylogenetic analysis, and mutation adaptations of HPAI viruses, clade 2.3.4.4b  
52 H5N1, identified in dairy cattle, domestic cats, and wild birds in Texas. As this manuscript is  
53 being prepared for submission, the USDA has also confirmed the detection of this HPAI virus  
54 strain in dairy herds in Idaho, Michigan, Ohio, North Carolina, and South Dakota. Furthermore,  
55 the first human case of this virus in Texas, after contact with infected dairy cattle, has also been  
56 reported ([https://www.dshs.texas.gov/news-alerts/dshs-reports-first-human-case-avian-influenza-](https://www.dshs.texas.gov/news-alerts/dshs-reports-first-human-case-avian-influenza-texas)  
57 [texas](https://www.dshs.texas.gov/news-alerts/dshs-reports-first-human-case-avian-influenza-texas)).

58

## 59 **Results**

### 60 **Detection of clade 2.3.4.4b HPAI viruses in domestic dairy cattle and cats in Texas in** 61 **March, 2024**

62 In February 2024, veterinarians in the Texas panhandle region observed lactating dairy cattle  
63 showing reduced feed intake, decreased milk production, and thickened yellow milk resembling  
64 colostrum. The syndrome peaked 4-6 days after onset and subsided within 10-14 days, mainly  
65 affecting older cows in mid to late lactation. By early March 2024, similar cases were reported in  
66 southwestern Kansas and northeastern New Mexico, with mortalities observed in wild birds and  
67 domestic cats near the affected areas. On March 21, 2024 milk samples from dairy cattle and  
68 fresh tissues from cats in Texas were received at the Iowa State University Veterinary Diagnostic  
69 Laboratory (ISU VDL). RT-PCR testing yielded positive results for influenza A virus (IAV) H5  
70 clade 2.3.4.4b in the milk samples from the affected dairy cows along with brain and lung tissue

71 from two domestic cats that reportedly consumed raw colostrum and milk at a dairy in Texas.  
72 The presence of highly pathogenic avian influenza (HPAI) H5N1 clade 2.3.4.4b was confirmed  
73 by National Veterinary Service Laboratories (NVSL) in Ames, IA, USA.  
74 The two milk samples from two cows and brain and lung samples from two cats, which tested  
75 positive for IAV, underwent next-generation sequencing (NGS) and full genome sequences were  
76 successfully obtained on March 23, 2024 for subtyping and other further analyses. NGS analyses  
77 confirmed that all four individual samples were positive for HPAI A (H5N1). These sequences  
78 have been deposited in GenBank with the Bioproject number PRJNA1092030 (Supplementary  
79 Table 1). Several days later, the NVSL determined six HPAIV genome sequences from six wild  
80 birds, one sequence from a skunk, one from a human case, and an additional four from dairy  
81 cattle in Texas. These sequences are available in the GISAID database (<https://gisaid.org>) and  
82 were included in this study for analysis (Supplementary Table 2).

### 83 **Phylogenetic and reassortment analysis**

84 To track the genetically most closely related strains, we conducted a comprehensive search  
85 within the Global Initiative on Sharing Avian Influenza Data (GISAID) database. Supplementary  
86 Tables 3-10 present the results, indicating that the viruses isolated from wild birds, cows, cats,  
87 and humans in Texas during March 2024 shared a common ancestor with nearly 100 percent  
88 homology. To elucidate the phylogeny of HPAI A (H5N1) viruses in our study, we conducted  
89 individual phylogenetic analyses for each genome segment including a subset of HPAI A  
90 (H5N1) reference sequences obtained from avian and mammalian sources in America submitted  
91 to GISAID since January 1, 2021. Our analysis revealed that the genomes of viruses from two  
92 cows and two cats closely aligned and formed a cluster within the HPAI A (H5N1) subclade  
93 2.3.4.4b shown in Figure 1 (for HA gene) and Supplementary Figures S1-S8 (for HA, NA, PB2,

94 PB1, PA, NP, M, and NS genes). Specifically, we evaluated the time to the most recent common  
95 ancestor (tMRCA) of H5N1 viruses in Texas in 2024 by constructing the maximum clade  
96 credibility (MCC) tree of the HA gene using BEAST v1.10.4 (Figure 1). Referring to the lineage  
97 classification of clade 2.3.4.4b H5N1 viruses in the United States by GenoFlu  
98 (<https://github.com/USDA-VS/GenoFlu>) (3), the HA genes of the clade 2.3.4.4b H5N1 in  
99 America since 2021 were divided into three lineages: ea1, ea2, and ea3. The HA genes of our  
100 four HPAI H5N1 viruses, along with others from dairy cattle, wild birds, a skunk, and a human  
101 during this outbreak period in 2024, were grouped under lineage ea1. In addition, the NA genes  
102 were clustered within ea1, PB2 in am2.2, PB1 in am4, PA in ea1, NP in am8, M in ea1, and NS  
103 in am1.1 lineages (Figures S1-S8).

104 The automated data pipeline available at <https://github.com/USDA-VS/GenoFlu> was further  
105 applied to define their genotype (3). As illustrated in Figure 2, our four HPAI H5N1 viruses,  
106 along with others from dairy cattle, wild birds, a skunk, and a human during this outbreak period  
107 in 2024 belonged to genotype B3.13, resulting from a reassortment event involving genotype  
108 B3.7 and a low pathogenic avian influenza (LPAI) virus. The B3.7 genotype, which emerged in  
109 2023, contributed seven gene segments, including PB2, PB1, PA, HA, NA, M, and NS, while the  
110 NP gene of B3.13 was originating from an LPAI virus resembling A/mallard/Alberta/567/2021  
111 (11N9)-like strains. According to our GenoFlu analysis, the B3.7 genotype represents a 4+4  
112 reassortant strain, with the HA, NA, PA, and MP genes originating from the H5N1 virus strain  
113 A1 in 2020, while the remaining segments (PB2, PB1, NP, and NS) are closely related to LPAI  
114 viruses. Our findings provide compelling evidence that the HPAI H5N1 viruses during this  
115 outbreak period in 2024 underwent reassortment events involving both HPAI and LPAI viruses.

#### 116 **Critical amino acid mutation analysis**

117 We conducted a comprehensive analysis of amino acid mutations, closely scrutinizing them to  
118 identify any changes potentially associated with increased affinity to human-type receptor  
119 heightened virulence, transmission or adaptation to mammalian hosts, and the mutants for  
120 antiviral resistance. We focused on comparing critical sites among eight HPAI virus isolates  
121 originating from dairy cattle and two from cats with those from terrestrial and marine mammals  
122 in the public source. This included an extensive dataset comprising 173 strains from Canidae, 39  
123 strains from Felidae, 53 isolates from Mustelidae, six strains from Ursidae, three strains from  
124 other species of Bovidae, two strains from Procyonidae, as well as 68 marine mammal isolates,  
125 comprising 38 strains from Phocidae, 16 strains from Otariidae, and 14 strains from Delphinidae  
126 (Table 1). All 8 HPAI H5N1 isolates derived from dairy cattle and two cats demonstrated the  
127 presence of residues 137A, 158N, and 160A within their HA segments, which may increase  
128 binding affinity to the human-type receptor, while none contained residues 192I, 225D, or 228S  
129 (15, 16). This consistent pattern mirrors that observed in the majority of HPAI isolates from both  
130 terrestrial and marine mammals. Furthermore, all eight HPAI H5N1 isolates originating from  
131 dairy cattle and two cats exhibited residues 30D, 43M, and 215A in M1 (17-19), as well as 42S,  
132 103F, and 106M in NS1 (20). Once again, this pattern is aligned with the prevalent composition  
133 observed across HPAI isolates from terrestrial and marine mammals, these mutants may increase  
134 the viral virulence in mammals. It is noteworthy that mutations 591K, 627K/V/A, or 701N in  
135 PB2, previously associated with mammalian host adaptation and enhanced transmission (18, 21,  
136 22), were absent in all eight HPAI H5N1 isolates originating from dairy cattle and two cats,  
137 while the HPAI virus from the human case exhibited E627K mutation in PB2. Conversely, these  
138 mutations displayed a high frequency of occurrence in strains from Felidae and a lower  
139 frequency in strains from Canidae, Mustelidae, Phocidae, Otariidae, and Delphinidae.

140 Additionally, no critical site mutations associated with increased influenza antiviral resistance  
141 have been identified in the virus.

## 142 **Discussion**

143 The widespread outbreaks of HPAI A (H5N1) clade 2.3.4.4b virus, since October 2020, have  
144 raised significant concerns regarding its impact on various mammalian species globally. Recent  
145 data reveal that, as of the latest assessment, 37 new mammal species have been afflicted since  
146 2021. The majority of these cases involve wild terrestrial mammals such as foxes, skunks, bears,  
147 bobcats, and raccoons (9, 23, 24). Intriguingly, there have been sporadic infections among  
148 domestic pets like domestic cats and dogs (25), as well as marine mammals, including dolphins  
149 and sea lions (26). Moreover, from January 2022 to April 2023, eight documented human cases  
150 of H5N1 influenza from clade 2.3.4.4b have been recorded, several of which were severe or fatal  
151 (<https://www.cdc.gov/flu/>), underlining the gravity of this situation. Adding to this growing list  
152 of affected species, we now characterize an H5N1 influenza virus strain from clade 2.3.4.4b  
153 infecting dairy cattle associated with a sudden drop in milk production. The detection of this  
154 virus in bovine milk raises a potential public health concern related to zoonotic transmission  
155 through unpasteurized milk. This underscores the need for public awareness, pasteurization of  
156 milk to maintain adequate food safety, outbreak management, and a holistic approach to human  
157 health management.

158 In addition to being the first documented occurrence of HPAI A (H5N1) clade 2.3.4.4b virus  
159 infection in domestic dairy cattle, early pathology observations in this outbreak revealed an  
160 apparent tissue tropism for mammary gland in lactating domestic dairy cattle (personnel  
161 communication). Prior to this incident, the clade 2.3.4.4b IAV has typically caused systemic and  
162 respiratory diseases in wild mammals (9). Gross and microscopic lesions in wild mammals were



163 frequently observed in organs such as the lung, heart, liver, spleen, and kidney, with some cases  
164 resulting in lesions in the brain leading to neurological signs. Furthermore, while it is widely  
165 recognized that certain strains of HPAI H5N1 clade 2.3.4.4b virus can breach the blood-brain  
166 barrier (9, 23, 25, 27), this is the first instance where the virus may penetrate the blood-milk  
167 barrier and be present in milk, raising potential public health concerns.

168 During this outbreak, HPAI virus strains from various sources such as wild birds, dairy cattle,  
169 cats, and a skunk, along with a human, displayed remarkably high nucleotide identities in their  
170 genome sequences, forming a distinct phylogenetic subcluster. These findings suggest an  
171 introduction of the 2.3.4.4b strain into Texas and neighboring regions by wild birds. The  
172 widespread detection of this HPAI virus strain across diverse regions and species underscores the  
173 complexity of its transmission pathways. Given the established role of migratory birds as  
174 reservoirs for avian influenza viruses (11-14, 26, 28, 29), it is important to highlight Texas's  
175 location within the Central flyway. Texas also has overlap in bird migratory patterns with  
176 neighboring states that are part of the Mississippi Flyway. Furthermore, the outbreak's  
177 occurrence in March coincides with the onset of the spring migration season, enhancing the  
178 likelihood of viral dissemination through migratory bird populations. Considering these factors, a  
179 highly plausible transmission route is hypothesized: wild birds may spread the virus through  
180 direct contact or contamination of water sources or feed stuffs utilized by dairy cattle or other  
181 animals such as skunks. Consequently, other cattle in the herd, workers and domestic felids on  
182 dairy farms may contract the virus through direct contact with infected cattle or after consuming  
183 raw colostrum and milk from infected cattle. The detection of the same strain of HPAI viruses in  
184 various wild bird species, such as blackbirds and common grackles in Texas and Canada geese in  
185 Wyoming (Central Flyway), provides further support for this hypothesis. Another potential

186 transmission scenario involves bovine-to-bovine spread. Recently, the USDA has verified the  
187 presence of this HPAI virus strain in dairy herds located in Idaho, Michigan, Ohio, North  
188 Carolina, and South Dakota (<https://www.aphis.usda.gov/news/agency-announcements/usda->  
189 [confirms-highly-pathogenic-avian-influenza-dairy-herd-idaho](https://www.aphis.usda.gov/news/agency-announcements/usda-confirms-highly-pathogenic-avian-influenza-dairy-herd-idaho)). In these cases, a documented  
190 history exists of cattle introduction from farms in the initial outbreak area, further supporting the  
191 hypothesis that lateral transmission can occur among cattle.

192 Our thorough examination of mutation adaptations, particularly those linked to human receptor  
193 binding affinity, increased virulence, transmission, or adaptation to mammalian hosts, offers  
194 critical insights into the risks posed by this specific strain of HPAI viruses. Notably, all HPAI  
195 viruses originating from dairy cattle and cats exhibit consistent amino acid residues in the HA  
196 gene, including 137A, 158N, and 160A, which have been documented to enhance the affinity of  
197 avian influenza viruses for human-type receptors (15, 16). Additionally, these dairy cattle-  
198 derived and cat-derived HPAI viruses harbor key virulence-increasing amino acid residues, such  
199 as 30D, 43M, and 215A in M1 (17-19), as well as 42S, 103F, and 106M in NS1(20). The  
200 presence of these amino acid mutations raises legitimate concerns regarding the potential for  
201 cross-species transmission to humans and other mammalian species. It is noteworthy that crucial  
202 mutations associated with mammalian host adaptation and enhanced transmission, specifically  
203 residues 591K, 627K/V/A, 701N, in PB2 (18, 21, 22), and 228S, along with the virulence-  
204 increasing residue 66S in PB1-F2(30), were conspicuously absent in all HPAI virus strains  
205 derived from dairy cattle and cats. This observation suggests that the current overall risk to  
206 human health is relatively low. However, it is imperative to recognize that influenza viruses have  
207 the capacity for rapid evolution within their host environments post-infection. A recent human  
208 case with direct contact with infected dairy cattle revealed a genetic change (PB2 E627K)

209 (<https://www.cdc.gov/flu/avianflu/spotlights/2023-2024/h5n1-analysis-texas.htm>), indicating the  
210 potential for adaptation or transmission events. This underscores the dynamic nature of influenza  
211 viruses and the importance of continued surveillance and vigilance in monitoring potential  
212 threats to human health.

213

#### 214 **Reference**

- 215 1. R. Xie *et al.*, The episodic resurgence of highly pathogenic avian influenza H5 virus.  
216 *Nature* **622**, 810-817 (2023).
- 217 2. N. S. Lewis *et al.*, Emergence and spread of novel H5N8, H5N5 and H5N1 clade 2.3. 4.4  
218 highly pathogenic avian influenza in 2020. *Emerging Microbes & Infections* **10**, 148-151  
219 (2021).
- 220 3. S. Youk *et al.*, H5N1 highly pathogenic avian influenza clade 2.3. 4.4 b in wild and  
221 domestic birds: Introductions into the United States and reassortments, December 2021–  
222 April 2022. *Virology* **587**, 109860 (2023).
- 223 4. F. A. Adlhoch C, Gonzales JL, Kuiken T, Marangon S, Niqueux É, et al, European  
224 Food Safety Authority; European Centre for Disease Prevention and Control; European  
225 Union Reference Laboratory for Avian Influenza. Avian influenza overview December  
226 2021 - March 2022. **2022;20:e07289**.
- 227 5. S. N. Bevins *et al.*, Intercontinental movement of highly pathogenic avian influenza A  
228 (H5N1) clade 2.3. 4.4 virus to the United States, 2021. *Emerging infectious diseases* **28**,  
229 1006 (2022).
- 230 6. M. Agüero *et al.*, Highly pathogenic avian influenza A (H5N1) virus infection in farmed  
231 minks, Spain, October 2022. *Eurosurveillance* **28**, 2300001 (2023).

- 232 7. J. M. Rijks *et al.*, Highly pathogenic avian influenza A (H5N1) virus in wild red foxes,  
233 the Netherlands, 2021. *Emerging infectious diseases* **27**, 2960 (2021).
- 234 8. N. Ariyama *et al.*, Highly pathogenic avian influenza a (H5N1) clade 2.3. 4.4 b virus in  
235 wild birds, Chile. *Emerging Infectious Diseases* **29**, 1842 (2023).
- 236 9. E. J. Elsmo *et al.*, Highly Pathogenic Avian Influenza A (H5N1) Virus Clade 2.3. 4.4 b  
237 Infections in Wild Terrestrial Mammals, United States, 2022. *Emerging Infectious*  
238 *Diseases* **29**, 2451 (2023).
- 239 10. A. Kandeil *et al.*, Rapid evolution of A (H5N1) influenza viruses after intercontinental  
240 spread to North America. *Nature communications* **14**, 3082 (2023).
- 241 11. Y. Li *et al.*, New avian influenza virus (H5N1) in wild birds, Qinghai, China. *Emerging*  
242 *infectious diseases* **17**, 265 (2011).
- 243 12. M. Gilbert *et al.*, Anatidae migration in the western Palearctic and spread of highly  
244 pathogenic avian influenza H5N1 virus. *Emerging infectious diseases* **12**, 1650 (2006).
- 245 13. S. Zhou *et al.*, Genetic evidence for avian influenza H5N1 viral transmission along the  
246 Black Sea–Mediterranean Flyway. *Journal of General Virology* **97**, 2129-2134 (2016).
- 247 14. H. Tian *et al.*, Avian influenza H5N1 viral and bird migration networks in Asia.  
248 *Proceedings of the National Academy of Sciences* **112**, 172-177 (2015).
- 249 15. S. Yamada *et al.*, Haemagglutinin mutations responsible for the binding of H5N1  
250 influenza A viruses to human-type receptors. *Nature* **444**, 378-382 (2006).
- 251 16. Y. Gao *et al.*, Identification of amino acids in HA and PB2 critical for the transmission of  
252 H5N1 avian influenza viruses in a mammalian host. *PLoS pathogens* **5**, e1000709 (2009).

- 253 17. S. Fan *et al.*, Two amino acid residues in the matrix protein M1 contribute to the  
254 virulence difference of H5N1 avian influenza viruses in mice. *Virology* **384**, 28-32  
255 (2009).
- 256 18. A. Suttie *et al.*, Inventory of molecular markers affecting biological characteristics of  
257 avian influenza A viruses. *Virus Genes* **55**, 739-768 (2019).
- 258 19. N. Nao *et al.*, A single amino acid in the M1 protein responsible for the different  
259 pathogenic potentials of H5N1 highly pathogenic avian influenza virus strains. *PloS one*  
260 **10**, e0137989 (2015).
- 261 20. P. Jiao *et al.*, A single-amino-acid substitution in the NS1 protein changes the  
262 pathogenicity of H5N1 avian influenza viruses in mice. *Journal of virology* **82**, 1146-  
263 1154 (2008).
- 264 21. L. Bordes *et al.*, Highly pathogenic avian influenza H5N1 virus infections in wild red  
265 foxes (*Vulpes vulpes*) show neurotropism and adaptive virus mutations. *Microbiology*  
266 *spectrum* **11**, e02867-02822 (2023).
- 267 22. M. Hatta *et al.*, Growth of H5N1 influenza A viruses in the upper respiratory tracts of  
268 mice. *PLoS pathogens* **3**, e133 (2007).
- 269 23. B. D. Cronk *et al.*, Infection and tissue distribution of highly pathogenic avian influenza  
270 A type H5N1 (clade 2.3. 4.4 b) in red fox kits (*Vulpes vulpes*). *Emerging Microbes &*  
271 *Infections* **12**, 2249554 (2023).
- 272 24. T. Maemura *et al.*, Characterization of highly pathogenic clade 2.3. 4.4 b H5N1 mink  
273 influenza viruses. *EBioMedicine* **97**, (2023).
- 274 25. F. S. François-Xavier BriandComments to Author , Isabelle Pierre, Véronique Beven,  
275 Edouard Hirchaud, Fabrice Hérault, René Planel, Angéline Rigau, Sibylle Bernard-

276 Stoecklin, Sylvie Van der Werf, Bruno Lina, Guillaume Gerbier, Nicolas Etteradossi,  
277 Audrey Schmitz, Eric Niqueux, and Béatrice Grasland, Highly Pathogenic Avian  
278 Influenza A(H5N1) Clade 2.3.4.4b Virus in Domestic Cat, France, 202. *Emerging*  
279 *infectious diseases* **29**, (2023).

280 26. M. Leguia *et al.*, Highly pathogenic avian influenza A (H5N1) in marine mammals and  
281 seabirds in Peru. *Nature Communications* **14**, 5489 (2023).

282 27. L. Bauer, F. F. Benavides, E. J. V. Kroeze, E. de Wit, D. van Riel, The  
283 neuropathogenesis of highly pathogenic avian influenza H5Nx viruses in mammalian  
284 species including humans. *Trends in Neurosciences*, (2023).

285 28. G. Zhang *et al.*, Bidirectional movement of emerging H5N8 avian influenza viruses  
286 between Europe and Asia via migratory birds since early 2020. *Molecular Biology and*  
287 *Evolution* **40**, msad019 (2023).

288 29. M. Fourment, A. E. Darling, E. C. Holmes, The impact of migratory flyways on the  
289 spread of avian influenza virus in North America. *BMC evolutionary biology* **17**, 1-12  
290 (2017).

291 30. R. P. Kamal *et al.*, Emergence of highly pathogenic avian influenza A (H5N1) virus PB1-  
292 F2 variants and their virulence in BALB/c mice. *Journal of Virology* **89**, 5835-5846  
293 (2015).

294

## 295 **Acknowledgement**

296 We thank Dr. Amy Baker from USDA Agriculture Research Service for her critical review of  
297 this manuscript. Additionally, we extend our gratitude to the faculty and staff at the ISU VDL  
298 who contributed to the processing and analysis of clinical samples in this investigation.

299

300 **List of Supplementary Materials**

301 Materials and Methods

302 Figures S1-S8

303 Table S1-S10

304

305  
306

**Figure 1.**

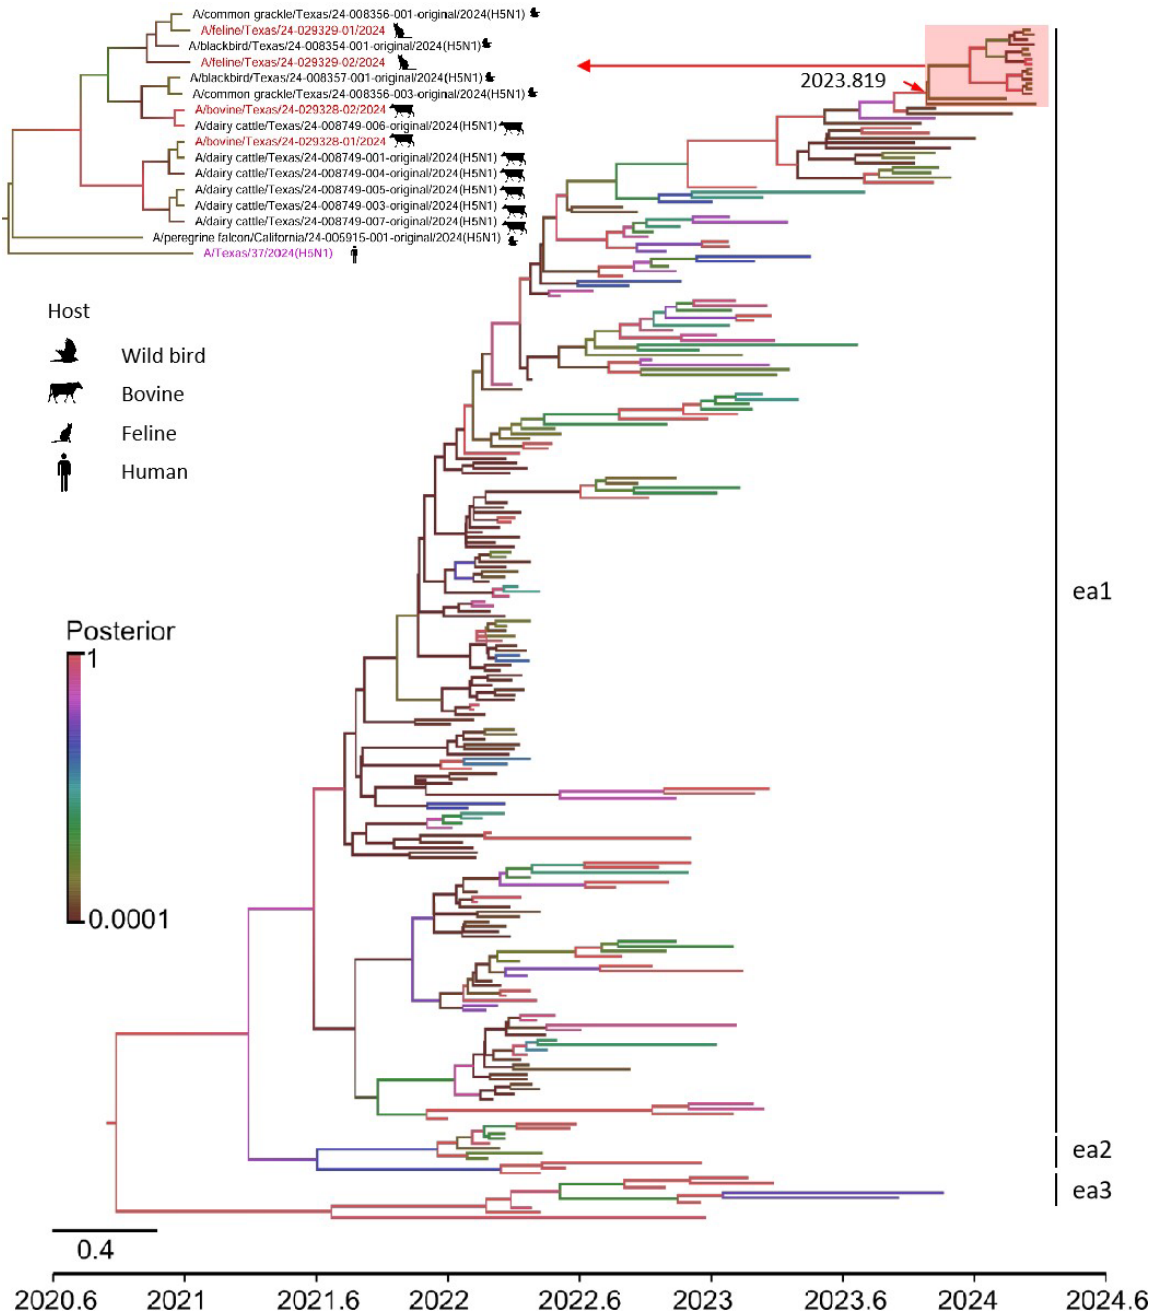

307

308

309



310 **Figure 1. Maximum clade credibility (MCC) tree of the HA genes of clade 2.3.4.4b H5N1**  
311 **viruses in the United States since 2021.**

312 The MCC tree is constructed by using BEAST v1.10.4 software package. Each branch is colored  
313 using posterior probability. The red frame represents H5N1 of Texas in 2024. The H5N1 viruses  
314 isolated in this study are shown in red, human isolate is shown in blue.

315  
316  
317  
318  
319  
320  
321  
322  
323  
324  
325  
326  
327  
328  
329  
330  
331  
332  
333  
334  
335  
336  
337  
338  
339  
340  
341  
342  
343  
344  
345  
346  
347  
348



361 **Table 1 Mutations detected in the clade 2.3.4.4b H5N1 viruses have contributed to**  
 362 **increased binding to human-type receptors and virulence in mammals.**

| Anim<br>al<br>Cate<br>gory | Host<br>(No. of<br>strains)     | Amino acids in HA that may<br>increase the affinity to human-type<br>receptor (H3 number) |          |          |                |          |          | Mutations in different genes that may increase virulence in mice |              |          |                |          |          |          |          |          |          |
|----------------------------|---------------------------------|-------------------------------------------------------------------------------------------|----------|----------|----------------|----------|----------|------------------------------------------------------------------|--------------|----------|----------------|----------|----------|----------|----------|----------|----------|
|                            |                                 |                                                                                           |          |          |                |          |          | PB2                                                              |              |          | PB<br>1-<br>F1 | M1       |          |          | NS1      |          |          |
|                            |                                 | 13<br>7A                                                                                  | 15<br>8N | 16<br>0A | 19<br>2I       | 22<br>5D | 22<br>8S | 591<br>K                                                         | 627K/<br>V/A | 70<br>1N | 66<br>S        | 30<br>D  | 43<br>M  | 21<br>5A | 42<br>S  | 10<br>3F | 106<br>M |
| Terres<br>trial            | Canidae<br>(173)                | 17<br>3                                                                                   | 17<br>3  | 17<br>3  | / <sup>a</sup> | /        | /        | 1                                                                | 20           | 2        | 16<br>8        | 17<br>3  | 17<br>3  | 17<br>3  | 17<br>2  | 17<br>3  | 173      |
|                            | Felidae<br>(39)                 | 37                                                                                        | 35       | 37       | /              | /        | /        | /                                                                | 32           | 34       | 38             | 38       | 38       | 38       | 38       | 38       | 38       |
|                            | Musteli<br>dae (53)             | 53                                                                                        | 53       | 53       | /              | /        | /        | /                                                                | 13           | 6        | 47             | 53       | 53       | 53       | 53       | 52       | 53       |
|                            | Ursidae<br>(6)                  | 6                                                                                         | 6        | 6        | /              | /        | /        | /                                                                | 3            | 2        | 6              | 6        | 6        | 6        | 6        | 6        | 6        |
|                            | <b>Dairy<br/>cattle<br/>(8)</b> | <b>8</b>                                                                                  | <b>8</b> | <b>8</b> | /              | /        | /        | /                                                                | /            | /        | /              | <b>8</b> | <b>8</b> | <b>8</b> | <b>8</b> | <b>8</b> | <b>8</b> |
|                            | Bovidae<br>(3)                  | 3                                                                                         | 3        | 3        | /              | /        | /        | /                                                                | /            | /        | /              | 3        | 3        | 3        | 3        | 3        | 3        |
|                            | Procyon<br>idae (2)             | 2                                                                                         | 2        | 2        | /              | /        | /        | /                                                                | 2            | /        | 2              | 2        | 2        | 2        | 2        | 2        | 2        |
| Marin<br>e                 | Phocida<br>e (38)               | 38                                                                                        | 38       | 38       | /              | /        | /        | 1                                                                | 6            | 3        | 38             | 39       | 39       | 39       | 39       | 39       | 39       |
|                            | Otariida<br>e (16)              | 16                                                                                        | 16       | 16       | /              | /        | /        | 10                                                               | /            | 2        | 16             | 16       | 16       | 16       | 16       | 16       | 16       |
|                            | Delphin<br>idae<br>(14)         | 14                                                                                        | 14       | 14       | 3              | /        | /        | 2                                                                | /            | 5        | 14             | 14       | 14       | 14       | 14       | 14       | 14       |

363 a, No such mutant.

364
